# Supplementary material
Source: PubMed Central journal article supplement (PMC6643810)
Supplement: ao7b00741_si_001.pdf [file ao7b00741_si_001.pdf]

## Supplementary Information

### Difatty Acyl-Conjugated Linear and Cyclic peptides for siRNA Delivery

Hung Do,<sup>†</sup> Meenakshi Sharma,<sup>†</sup> Naglaa Salem El-Sayed, Parvin Mahdipoor, Emira Bousoik, Keykavous Parang<sup>\*</sup>, Hamidreza Montazeri Aliabadi<sup>\*</sup>

Department of Biomedical and Pharmaceutical Sciences, Center For Targeted Drug Delivery, Chapman University School of Pharmacy, Harry and Diane Rinker Health Science Campus, Irvine, California 92618, United States

<sup>†</sup> These authors contributed equally

#### \* Corresponding Authors

*Hamidreza Montazeri Aliabadi, Ph. D*  
Chapman University School of Pharmacy  
Harry and Diane Rinker Health Science Campus  
#211, 9401 Jeronimo Road  
Irvine, CA 92618, USA  
Tel: (714) 516-5492. Fax: (714) 516-5481. E-mail: [montazer@chapman.edu](mailto:montazer@chapman.edu)

*Keykavous Parang, Ph. D*  
Chapman University School of Pharmacy  
Harry and Diane Rinker Health Science Campus  
#262, 9401 Jeronimo Road  
Irvine, CA 92618, USA  
Tel: (714) 516-5489. Fax: (714) 516-5481. E-mail: [parang@chapman.edu](mailto:parang@chapman.edu)

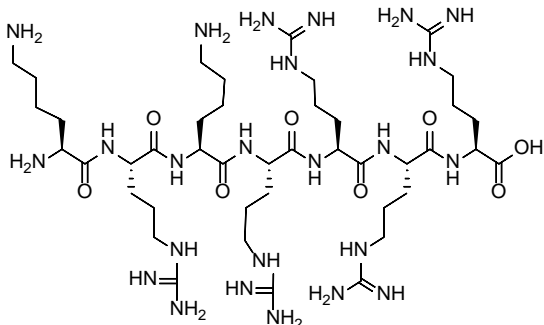

Chemical Formula:  $C_{42}H_{86}N_{24}O_8$   
Exact Mass: 1054.7060

**LP**

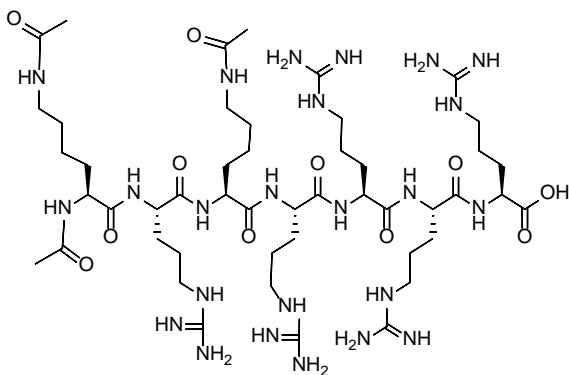

Chemical Formula:  $C_{48}H_{92}N_{24}O_{11}$   
Exact Mass: 1180.7377

**LP-C2**

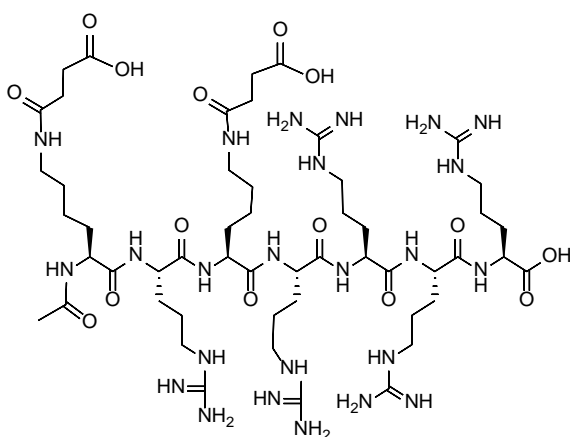

Chemical Formula:  $C_{52}H_{96}N_{24}O_{15}$   
Exact Mass: 1296.7487

**LP-C4**

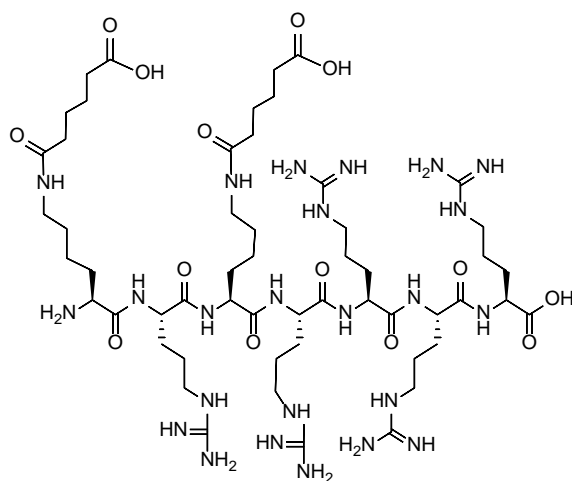

Chemical Formula:  $C_{54}H_{102}N_{24}O_{14}$   
Exact Mass: 1310.8007

**LP-C6**

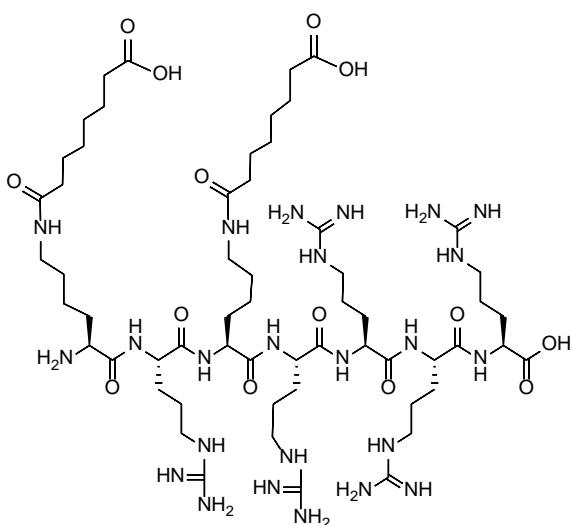

Chemical Formula:  $C_{58}H_{110}N_{24}O_{14}$   
Exact Mass: 1366.8633

**LP-C8**

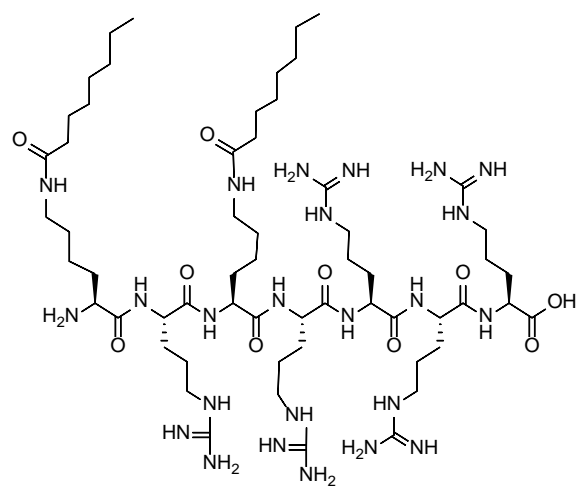

Chemical Formula:  $C_{58}H_{114}N_{24}O_{10}$   
Exact Mass: 1306.9150

**LP-C8\***

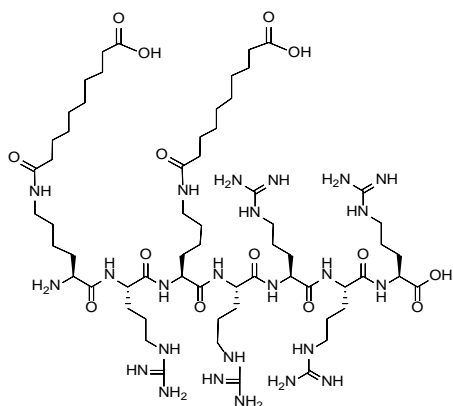

Chemical Formula:  $C_{62}H_{118}N_{24}O_{14}$   
Exact Mass: 1422.9259

**LP-C10**

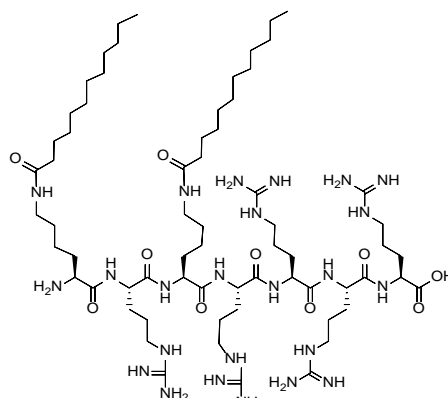

Chemical Formula:  $C_{66}H_{130}N_{24}O_{10}$   
Exact Mass: 1419.0402

**LP-C12**

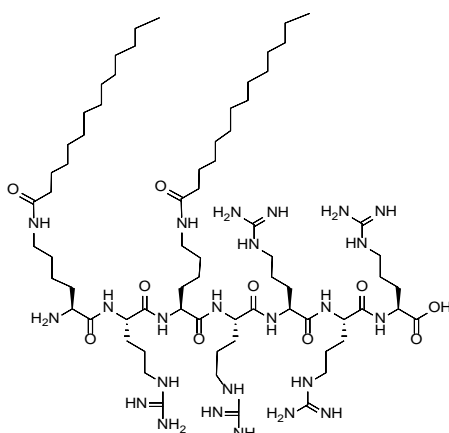

Chemical Formula:  $C_{70}H_{138}N_{24}O_{10}$   
Exact Mass: 1475.1028

**LP-C14**

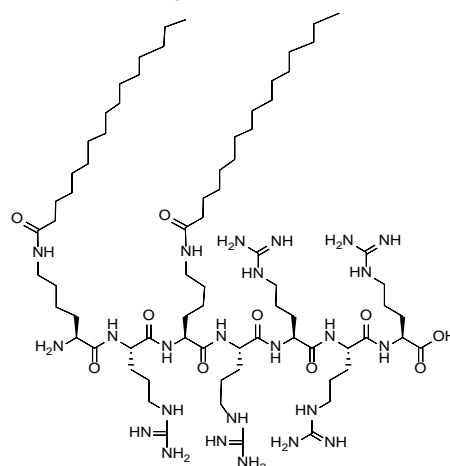

Chemical Formula:  $C_{74}H_{146}N_{24}O_{10}$   
Exact Mass: 1531.1654

**LP-C16**

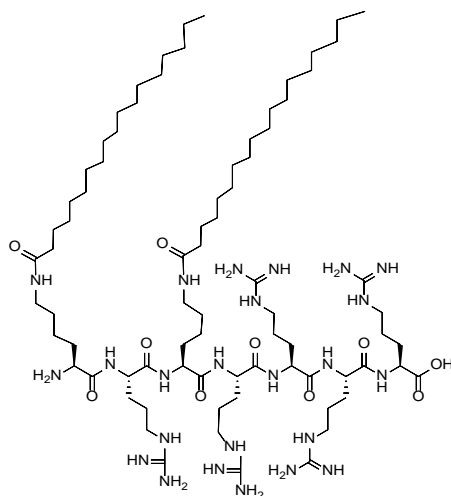

Chemical Formula:  $C_{78}H_{154}N_{24}O_{10}$   
Exact Mass: 1587.2280

**LP-C18**

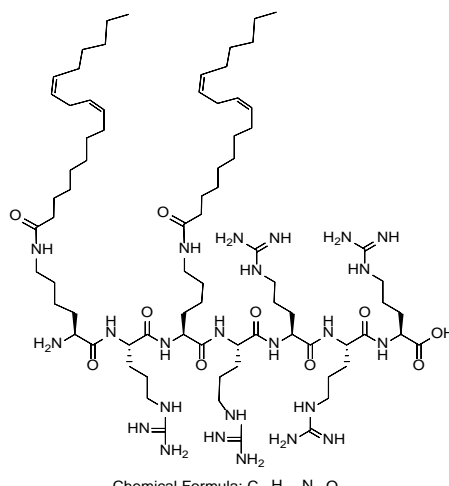

Chemical Formula:  $C_{78}H_{146}N_{24}O_{10}$   
Exact Mass: 1579.1654

**LP-C18\***

**Figure S1.** Chemical structures of linear peptide-fatty acid conjugates

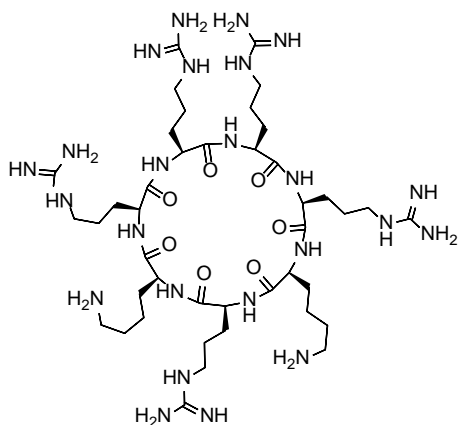

Chemical Formula:  $C_{42}H_{84}N_{24}O_7$   
Exact Mass: 1036.6955

**CP**

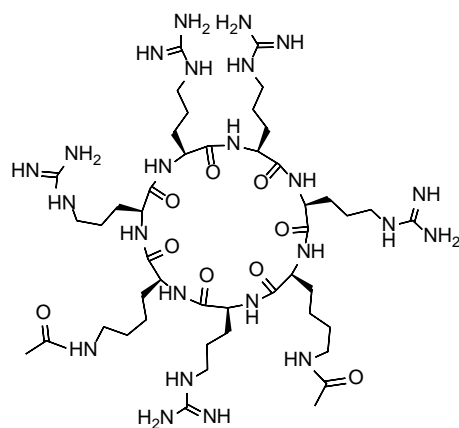

Chemical Formula:  $C_{46}H_{88}N_{24}O_9$   
Exact Mass: 1120.7166

**CP-C2**

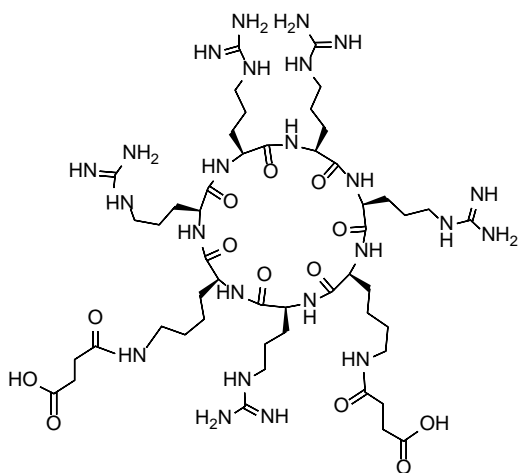

Chemical Formula:  $C_{50}H_{92}N_{24}O_{13}$   
Exact Mass: 1236.7276

**CP-C4**

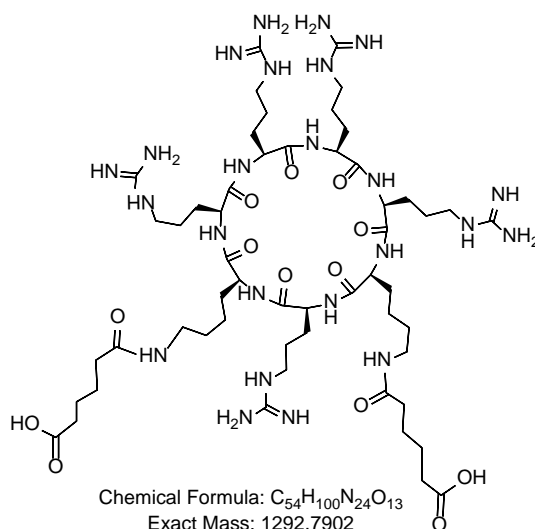

Chemical Formula:  $C_{54}H_{100}N_{24}O_{13}$   
Exact Mass: 1292.7902

**CP-C6**

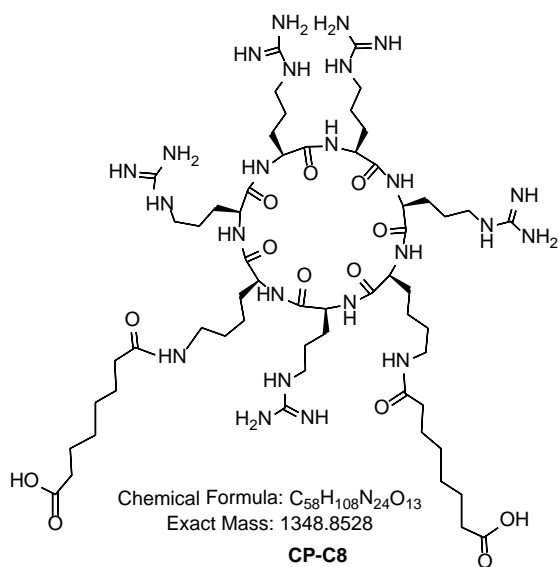

Chemical Formula:  $C_{58}H_{108}N_{24}O_{13}$   
Exact Mass: 1348.8528

**CP-C8**

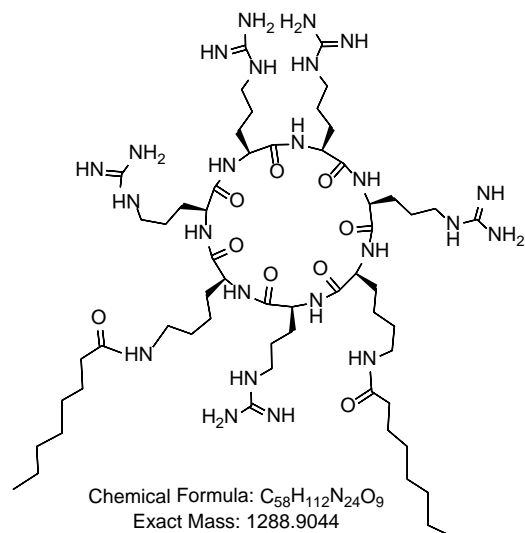

Chemical Formula:  $C_{58}H_{112}N_{24}O_9$   
Exact Mass: 1288.9044

**CP-C8\***

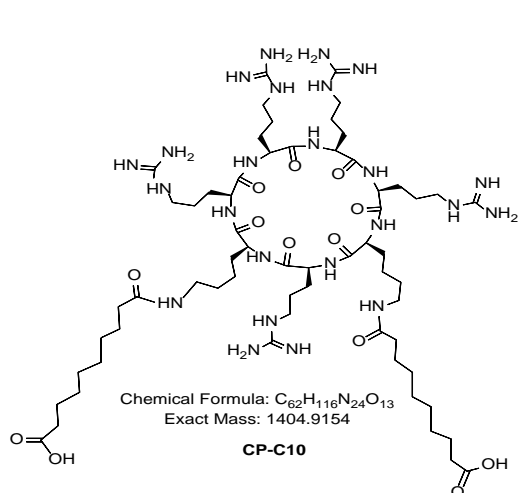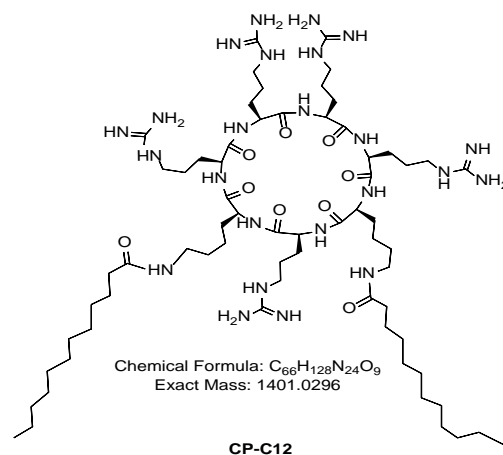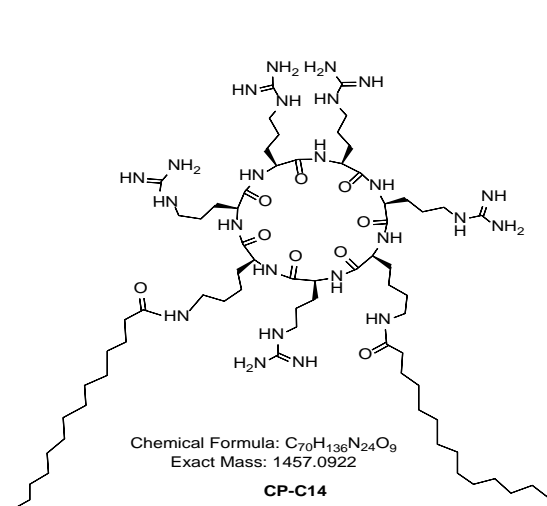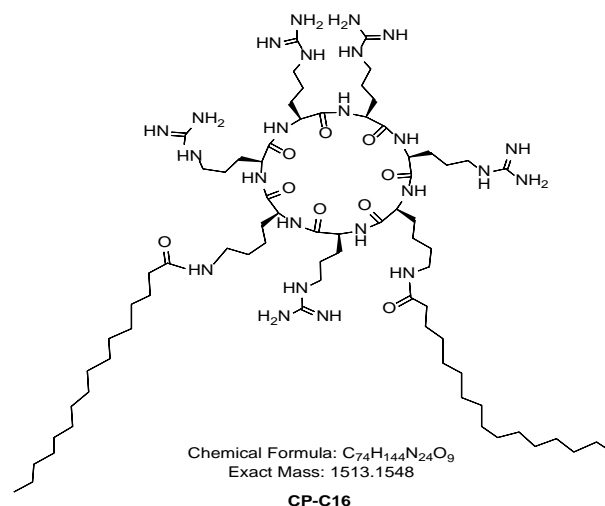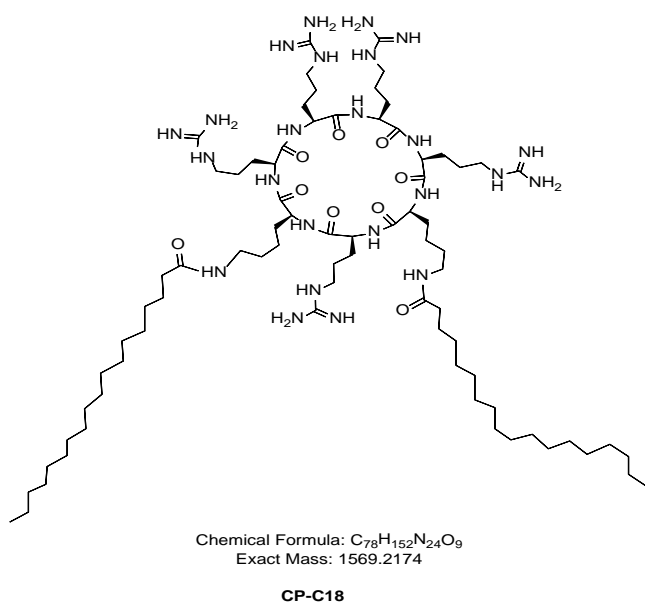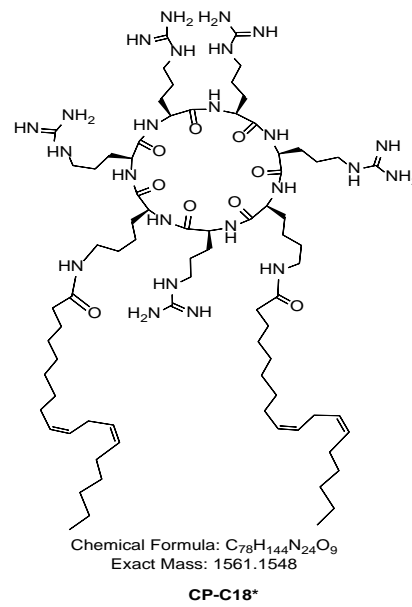

**Figure S2.** Chemical structures of cyclic peptide-fatty acid conjugates.

**Table S1.** MALDI-TOF Mass Spectrometer Data for Difatty Acyl Linear and Cyclic Peptides

| <b>Compound</b>                                                             | <b>Molecular Formula</b>                                         | <b>Calculated MW</b> | <b>MALDI-TOF (m/z):<br/>found</b>        |
|-----------------------------------------------------------------------------|------------------------------------------------------------------|----------------------|------------------------------------------|
| <b>R<sub>5</sub>K<sub>2</sub> (Linear Peptide, LP)</b>                      | C <sub>42</sub> H <sub>86</sub> N <sub>24</sub> O <sub>8</sub>   | 1054.7060            | 1055.5539 [M+H] <sup>+</sup>             |
| <b>R<sub>5</sub>K<sub>2</sub>-C<sub>2</sub> (LP-C2, with N-acetyl cap)</b>  | C <sub>48</sub> H <sub>92</sub> N <sub>24</sub> O <sub>11</sub>  | 1180.7377            | 1180.7629 [M] <sup>+</sup>               |
| <b>R<sub>5</sub>K<sub>2</sub>-C<sub>4</sub> (LP-C4, with N-acetyl cap)</b>  | C <sub>52</sub> H <sub>96</sub> N <sub>24</sub> O <sub>15</sub>  | 1296.7478            | 1296.5958 [M] <sup>+</sup>               |
| <b>R<sub>5</sub>K<sub>2</sub>-C<sub>6</sub> (LP-C6)</b>                     | C <sub>54</sub> H <sub>102</sub> N <sub>24</sub> O <sub>14</sub> | 1310.8007            | 1311.4558 [M+H] <sup>+</sup>             |
| <b>R<sub>5</sub>K<sub>2</sub>-C<sub>8</sub> (LP-C8)</b>                     | C <sub>58</sub> H <sub>110</sub> N <sub>24</sub> O <sub>14</sub> | 1366.8633            | 1367.4758 [M+H] <sup>+</sup>             |
| <b>R<sub>5</sub>K<sub>2</sub>-C<sub>8</sub>* (LP-C8*, Caprylic Acid)</b>    | C <sub>58</sub> H <sub>114</sub> N <sub>24</sub> O <sub>14</sub> | 1306.9150            | 1307.3541 [M+H] <sup>+</sup>             |
| <b>R<sub>5</sub>K<sub>2</sub>-C<sub>10</sub> (LP-C10, Sebacic Acid)</b>     | C <sub>62</sub> H <sub>118</sub> N <sub>24</sub> O <sub>14</sub> | 1422.9259            | 1423.5748 [M+H] <sup>+</sup>             |
| <b>R<sub>5</sub>K<sub>2</sub>-C<sub>12</sub> (LP-C12)</b>                   | C <sub>66</sub> H <sub>130</sub> N <sub>24</sub> O <sub>10</sub> | 1419.0402            | 1419.8375 [M+H] <sup>+</sup>             |
| <b>R<sub>5</sub>K<sub>2</sub>-C<sub>14</sub> (LP-C14)</b>                   | C <sub>70</sub> H <sub>138</sub> N <sub>24</sub> O <sub>10</sub> | 1475.1028            | 1475.8762 [M+H] <sup>+</sup>             |
| <b>R<sub>5</sub>K<sub>2</sub>-C<sub>16</sub> (LP-C16)</b>                   | C <sub>74</sub> H <sub>146</sub> N <sub>24</sub> O <sub>10</sub> | 1531.1654            | 1531.9497 [M+H] <sup>+</sup>             |
| <b>R<sub>5</sub>K<sub>2</sub>-C<sub>18</sub> (LP-C18, Steric Acid)</b>      | C <sub>78</sub> H <sub>154</sub> N <sub>24</sub> O <sub>10</sub> | 1587.2280            | 1588.0333 [M+H] <sup>+</sup>             |
| <b>R<sub>5</sub>K<sub>2</sub>-C<sub>18</sub>* (LP-C18*, Linoleic Acid)</b>  | C <sub>78</sub> H <sub>146</sub> N <sub>24</sub> O <sub>10</sub> | 1579.1654            | 1582.0409 [M+3] <sup>+</sup> .           |
| <b>[R<sub>5</sub>K<sub>2</sub>] (Cyclic Peptide, CP)</b>                    | C <sub>42</sub> H <sub>84</sub> N <sub>24</sub> O <sub>7</sub>   | 1036.6955            | 1037.9739 [M+H] <sup>+</sup>             |
| <b>[R<sub>5</sub>K<sub>2</sub>]-C<sub>2</sub> (CP-2)</b>                    | C <sub>46</sub> H <sub>88</sub> N <sub>24</sub> O <sub>9</sub>   | 1120.7166            | 1121.8856 [M+H] <sup>+</sup>             |
| <b>[R<sub>5</sub>K<sub>2</sub>]-C<sub>4</sub> (CP-4)</b>                    | C <sub>50</sub> H <sub>92</sub> N <sub>24</sub> O <sub>13</sub>  | 1236.7276            | 1296.8387 [ M + Na + K -2H] <sup>+</sup> |
| <b>[R<sub>5</sub>K<sub>2</sub>]-C<sub>6</sub> (CP-6)</b>                    | C <sub>54</sub> H <sub>100</sub> N <sub>24</sub> O <sub>13</sub> | 1292.7902            | 1293.2880 [M+H] <sup>+</sup>             |
| <b>[R<sub>5</sub>K<sub>2</sub>]-C<sub>8</sub> (CP-8, Suberic Acid)</b>      | C <sub>58</sub> H <sub>108</sub> N <sub>24</sub> O <sub>13</sub> | 1348.8528            | 1349.9468 [M+H] <sup>+</sup>             |
| <b>[R<sub>5</sub>K<sub>2</sub>]-C<sub>8</sub>* (CP-8*, Caprylic Acid)</b>   | C <sub>58</sub> H <sub>112</sub> N <sub>24</sub> O <sub>9</sub>  | 1289.9044            | 1311.4558 [M+Na-H] <sup>+</sup>          |
| <b>[R<sub>5</sub>K<sub>2</sub>]-C<sub>10</sub> (CP-10)</b>                  | C <sub>62</sub> H <sub>116</sub> N <sub>24</sub> O <sub>13</sub> | 1404.9154            | 1405.9323 [M+H] <sup>+</sup>             |
| <b>[R<sub>5</sub>K<sub>2</sub>]-C<sub>12</sub> (CP-12)</b>                  | C <sub>66</sub> H <sub>128</sub> N <sub>24</sub> O <sub>9</sub>  | 1401.0296            | 1403.3227 [M+2] <sup>+</sup>             |
| <b>[R<sub>5</sub>K<sub>2</sub>]-C<sub>14</sub> (CP-14)</b>                  | C <sub>70</sub> H <sub>136</sub> N <sub>24</sub> O <sub>9</sub>  | 1457.0922            | 1460.8668 [M+3] <sup>+</sup>             |
| <b>[R<sub>5</sub>K<sub>2</sub>]-C<sub>16</sub> (CP-16)</b>                  | C <sub>74</sub> H <sub>144</sub> N <sub>24</sub> O <sub>9</sub>  | 1513.1548            | 1514.3129 [M+H] <sup>+</sup>             |
| <b>[R<sub>5</sub>K<sub>2</sub>]-C<sub>18</sub> (CP-18, Steric Acid)</b>     | C <sub>78</sub> H <sub>152</sub> N <sub>24</sub> O <sub>9</sub>  | 1569.2174            | 1570.0027 [M+H] <sup>+</sup>             |
| <b>[R<sub>5</sub>K<sub>2</sub>]-C<sub>18</sub>* (CP-18*, Linoleic Acid)</b> | C <sub>78</sub> H <sub>144</sub> N <sub>24</sub> O <sub>9</sub>  | 1561.1548            | 1563.0090 [M+2] <sup>+</sup>             |

Table S2 – The N/P ratio for selected w/w peptide:siRNA ratios used in this project

| Peptide | Molecular weight | Net Positive Charge | N/P ratio |          |          |
|---------|------------------|---------------------|-----------|----------|----------|
|         |                  |                     | 1:1 w/w   | 1:20 w/w | 1:80 w/w |
| LP      | 1055             | 7                   | 2.194749  | 43.89498 | 175.5799 |
| LP-C2   | 1181             | 4                   | 1.120275  | 22.40551 | 89.62203 |
| LP-C4   | 1297             | 2                   | 0.510026  | 10.20053 | 40.80212 |
| LP-C6   | 1311             | 3                   | 0.756838  | 15.13676 | 60.54702 |
| LP-C8   | 1367             | 3                   | 0.725796  | 14.51591 | 58.06366 |
| LP-C8*  | 1307             | 5                   | 1.265147  | 25.30293 | 101.2117 |
| LP-C10  | 1423             | 3                   | 0.6972    | 13.94399 | 55.77597 |
| LP-C12  | 1419             | 5                   | 1.165181  | 23.30363 | 93.21451 |
| LP-C14  | 1475             | 5                   | 1.120898  | 22.41795 | 89.67181 |
| LP-C16  | 1531             | 5                   | 1.079857  | 21.59713 | 86.38853 |
| LP-C18  | 1587             | 5                   | 1.041715  | 20.8343  | 83.3372  |
| LP-C18* | 1579             | 5                   | 1.047034  | 20.94067 | 83.76268 |
| CP      | 1037             | 7                   | 2.232878  | 44.65756 | 178.6303 |
| CP-C2   | 1121             | 5                   | 1.475341  | 29.50682 | 118.0273 |
| CP-C4   | 1237             | 3                   | 0.802168  | 16.04336 | 64.17345 |
| CP-C6   | 1293             | 3                   | 0.767382  | 15.34763 | 61.39053 |
| CP-C8   | 1349             | 3                   | 0.735487  | 14.70974 | 58.83895 |
| CP-C8*  | 1290             | 5                   | 1.281831  | 25.63662 | 102.5465 |
| CP-C10  | 1405             | 3                   | 0.706138  | 14.12275 | 56.491   |
| CP-C12  | 1401             | 5                   | 1.18016   | 23.6032  | 94.4128  |
| CP-C14  | 1457             | 5                   | 1.134753  | 22.69505 | 90.78021 |
| CP-C16  | 1513             | 5                   | 1.09271   | 21.8542  | 87.41679 |
| CP-C18  | 1569             | 5                   | 1.053671  | 21.07342 | 84.29369 |
| CP-C18* | 1561             | 5                   | 1.059113  | 21.18226 | 84.72903 |







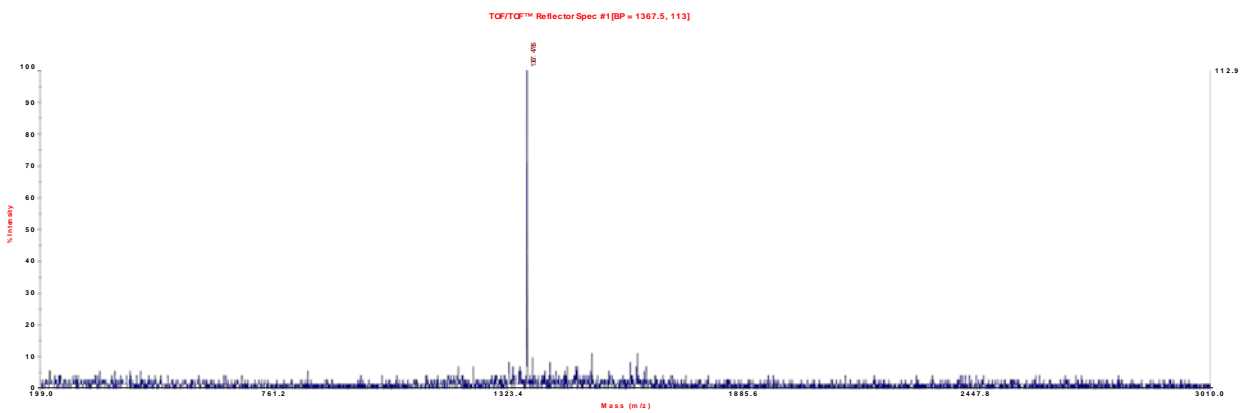

R<sub>5</sub>K<sub>2</sub>-C<sub>8</sub> (LP-C8): MALDI-TOF (m/z): C<sub>58</sub>H<sub>110</sub>N<sub>24</sub>O<sub>14</sub> calc: 1366.8633; found: 1367.4758 [M+H]<sup>+</sup>.



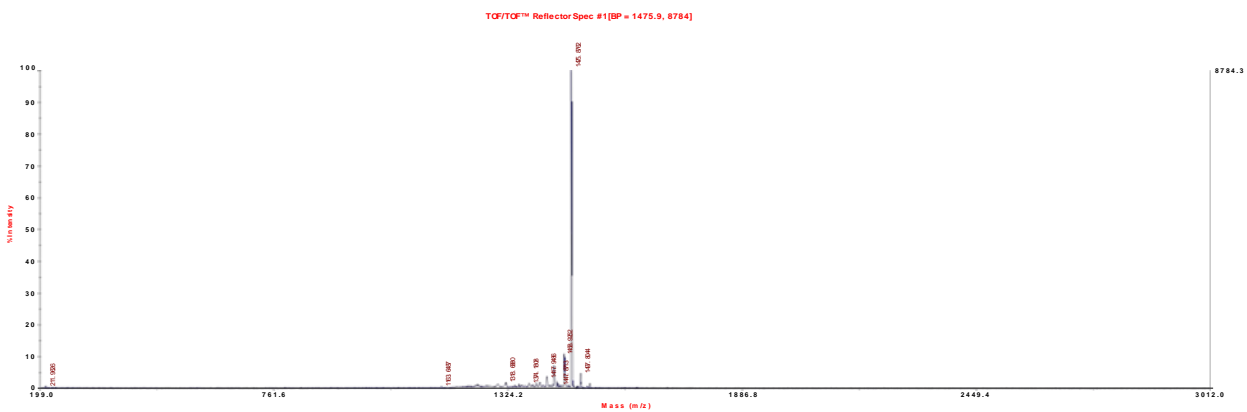

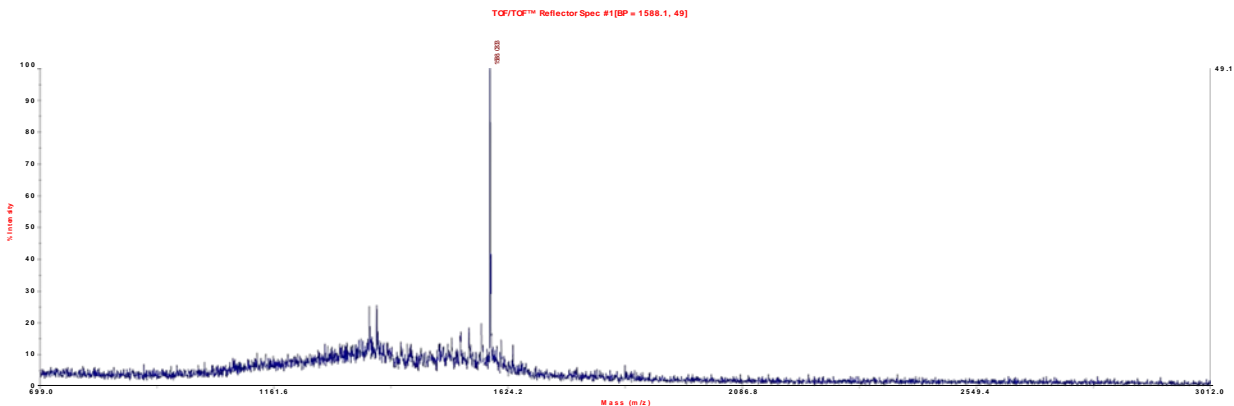

R<sub>5</sub>K<sub>2</sub>-C<sub>18</sub> (LP-C18): MALDI-TOF (m/z): C<sub>78</sub>H<sub>154</sub>N<sub>24</sub>O<sub>10</sub> calc: 1587.2280; found: 1588.0333 [M+H]<sup>+</sup>.

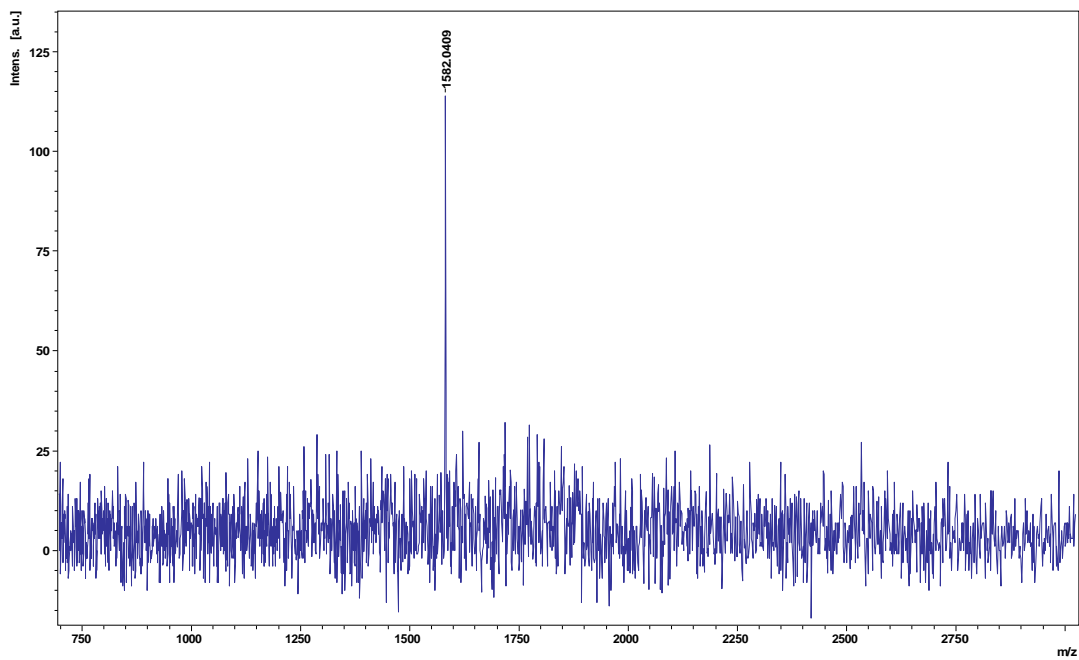

R<sub>3</sub>K<sub>2</sub>-C<sub>18</sub> (LP-C18\*): MALDI-TOF (m/z): C<sub>78</sub>H<sub>146</sub>N<sub>24</sub>O<sub>10</sub> calc: 1579.1654; found: 1582.0409 [M+3]<sup>+</sup>.

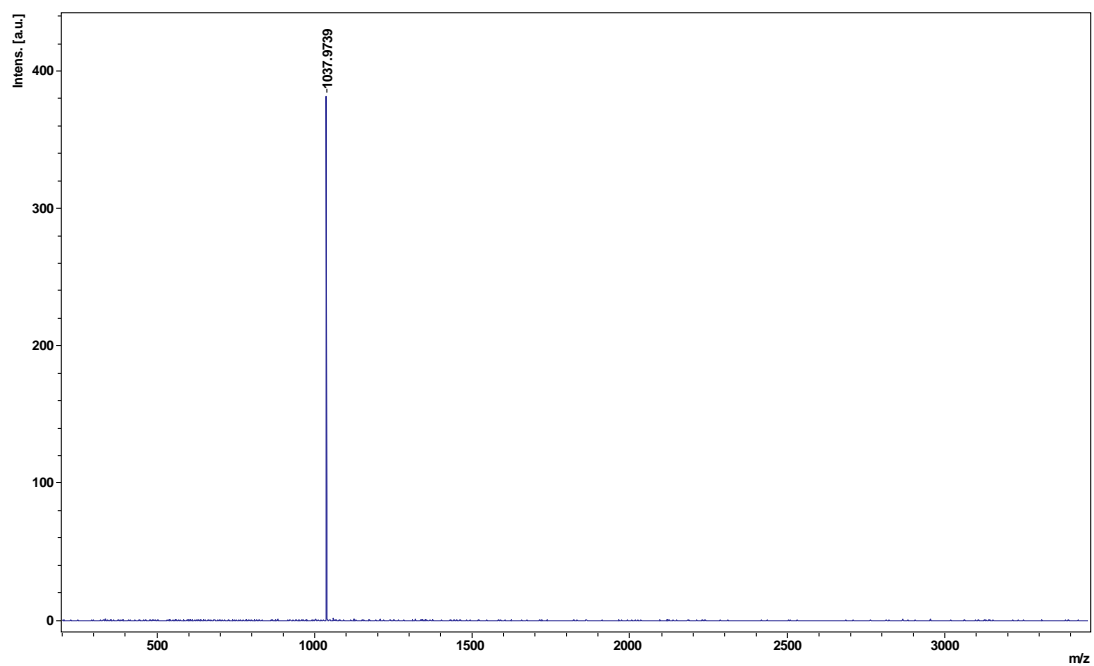

[R<sub>5</sub>K<sub>2</sub>] (Cyclic Peptide): MALDI-TOF (m/z): C<sub>42</sub>H<sub>84</sub>N<sub>24</sub>O<sub>7</sub> calc: 1036.6955; found: 1037.9739  
[M+H]<sup>+</sup>.

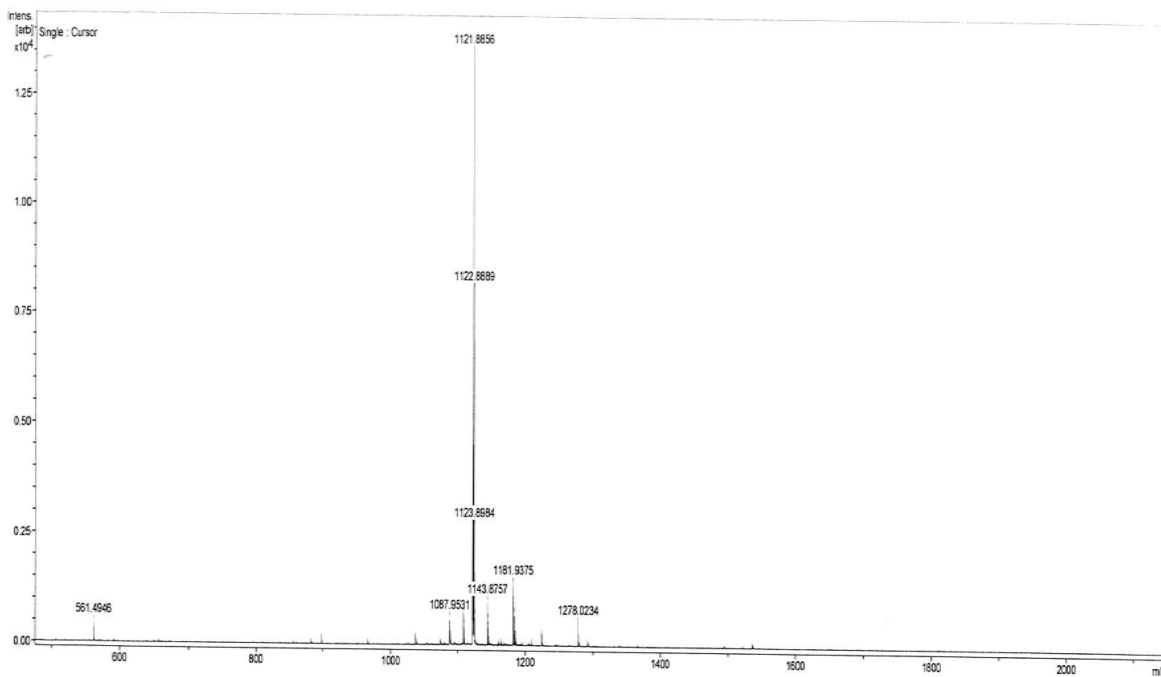

[R<sub>5</sub>K<sub>2</sub>]-C<sub>2</sub> (CP-C2): MALDI-TOF (m/z): C<sub>46</sub>H<sub>88</sub>N<sub>24</sub>O<sub>9</sub> calc: 1120.7166; found: 1121.8856  
[M+H]<sup>+</sup>, 1143.8757 [M+Na]<sup>+</sup>, 1181.9375 [M+Na+K]<sup>+</sup>.

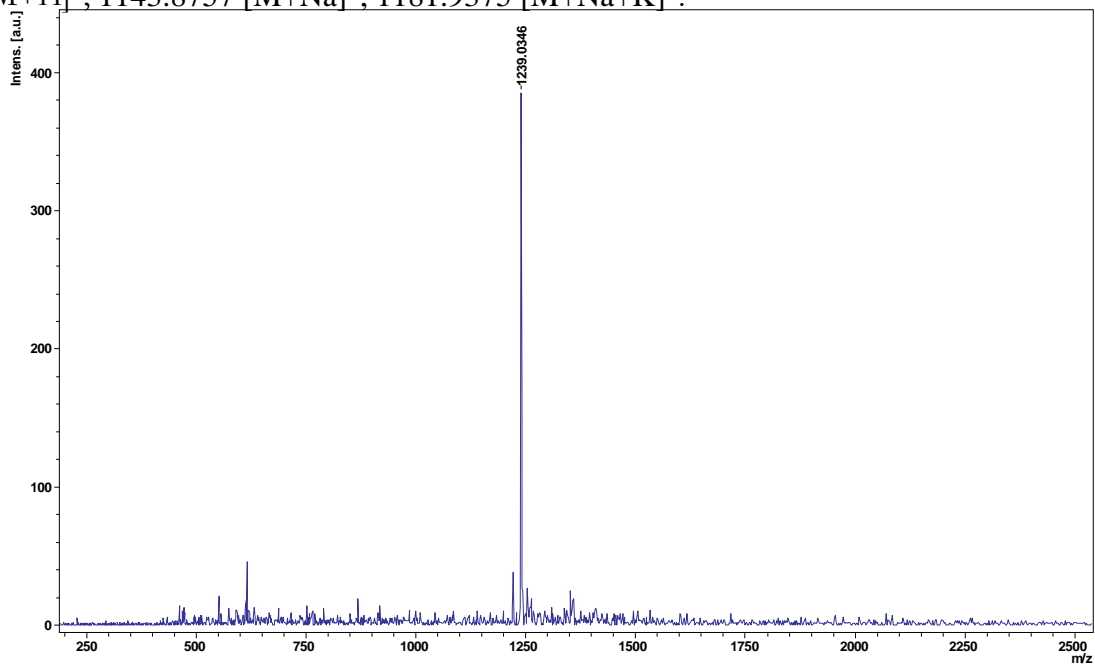

[R<sub>5</sub>K<sub>2</sub>]-C<sub>4</sub> (CP-C4): MALDI-TOF (m/z): C<sub>50</sub>H<sub>92</sub>N<sub>24</sub>O<sub>13</sub> calc: 1236.7276; found:  
1239.0346 [M+3]<sup>+</sup>.

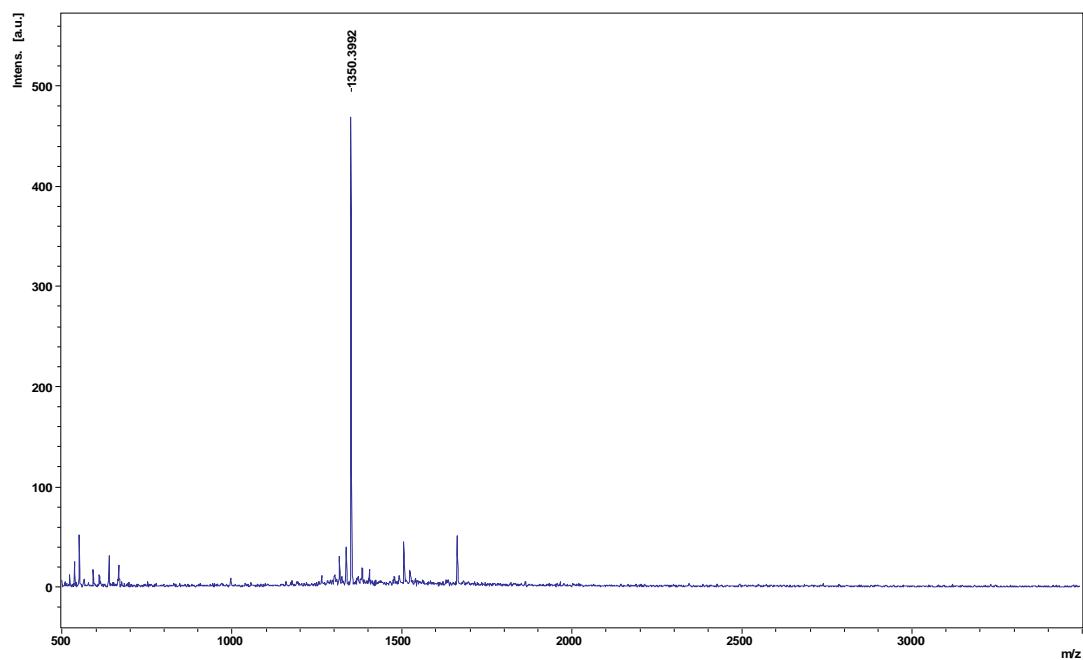

$[R_5K_2]-C_8$  (CP-C8) MALDI-TOF (m/z):  $C_{58}H_{108}N_{24}O_{13}$  calc: 1348.8528; found: 1350.3992  
 $[M+H]^+$ .

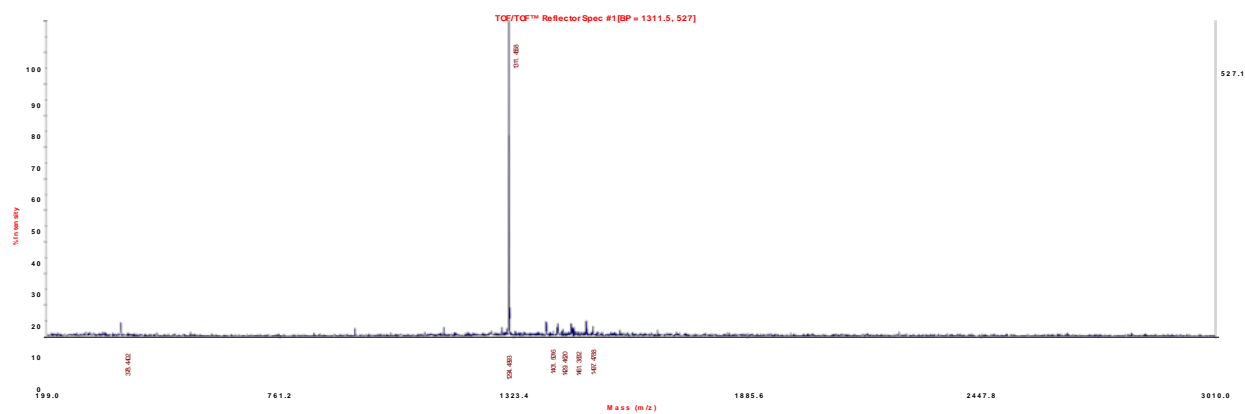

$[R_5K_2]-C_{8^*}$  (CP-C8\*): MALDI-TOF (m/z):  $C_{58}H_{112}N_{24}O_9$  calc: 1289.9044; found: 1311.4558  
 $[M+Na-H]^+$ .



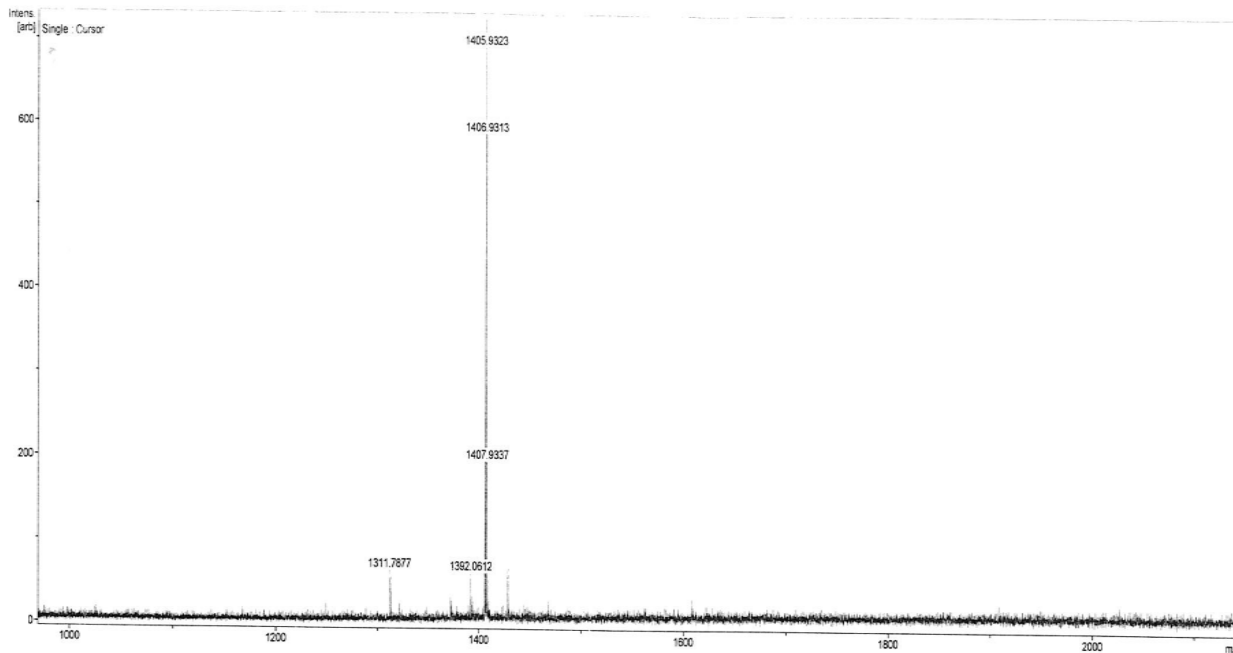

$[R_5K_2]-C_{10}$  (CP-C10): MALDI-TOF (m/z):  $C_{62}H_{116}N_{24}O_{13}$  calc: 1404.9154; found: 1405.9323  
 $[M+H]^+$ .

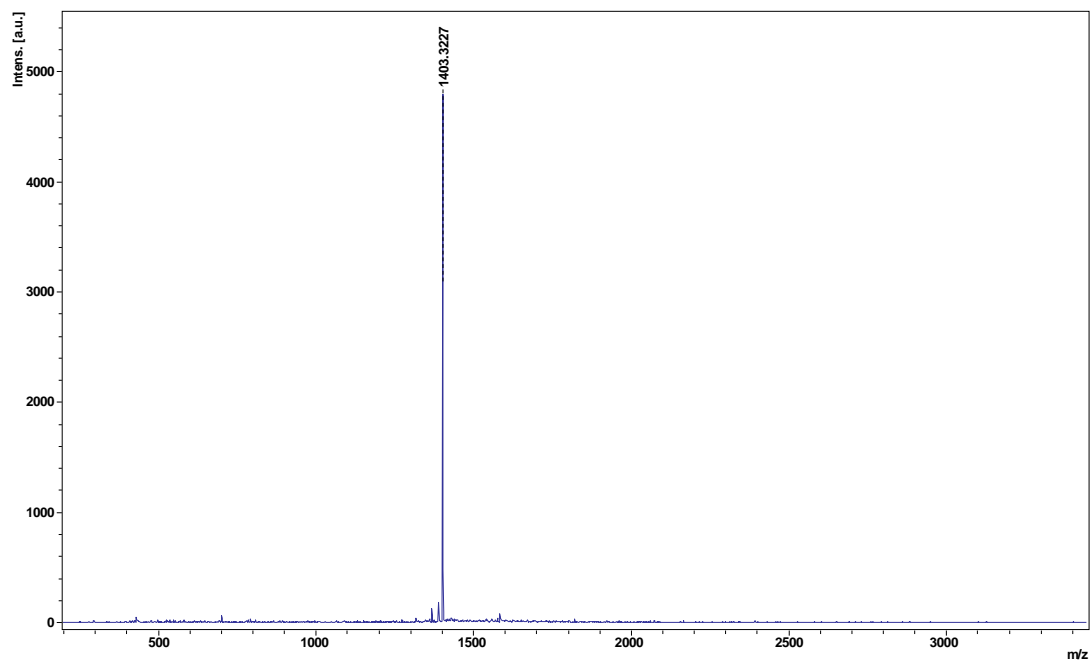

$[R_5K_2]-C_{12}$  (CP-C12): MALDI-TOF (m/z):  $C_{66}H_{128}N_{24}O_9$  calc: 1401.0296; found: 1403.3227  
 $[M+2]^+$ .

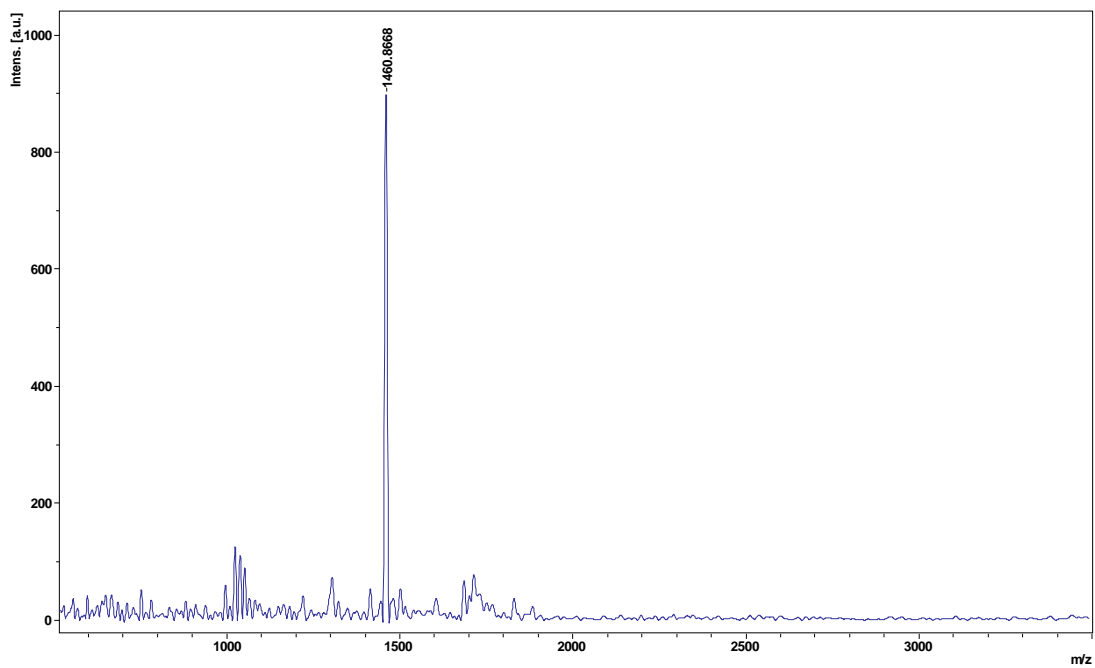

[R<sub>5</sub>K<sub>2</sub>]-C<sub>14</sub> (CP-C14): MALDI-TOF (m/z): C<sub>70</sub>H<sub>136</sub>N<sub>24</sub>O<sub>9</sub> calc: 1457.0922; found: 1460.8668 [M+3]<sup>+</sup>.

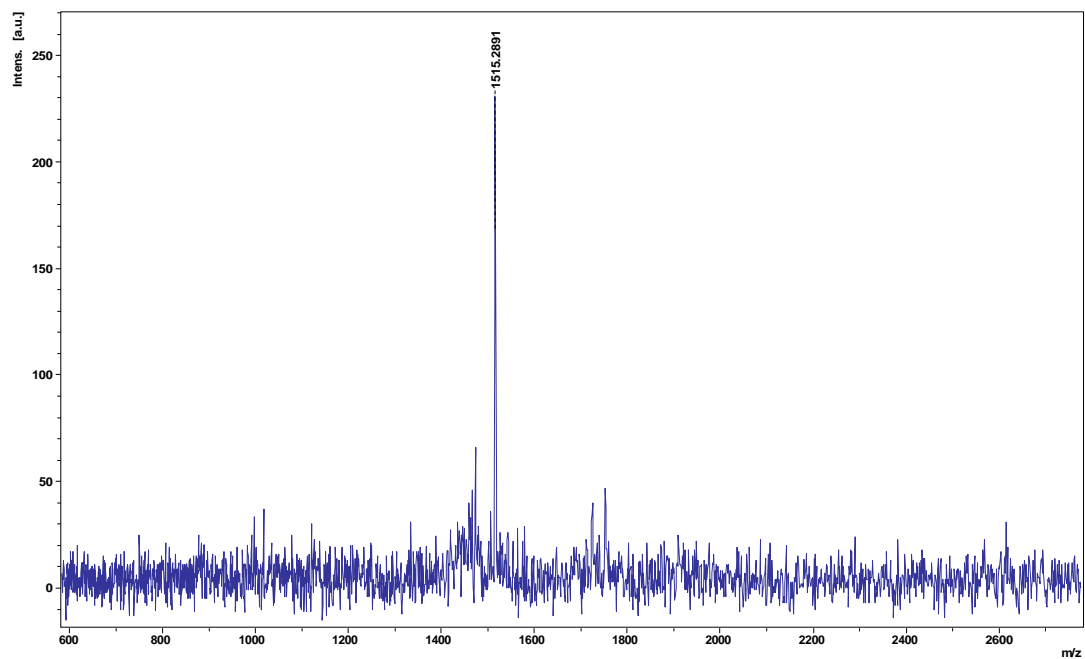

[R<sub>5</sub>K<sub>2</sub>]-C<sub>16</sub> (CP-C16): MALDI-TOF (m/z): C<sub>74</sub>H<sub>144</sub>N<sub>24</sub>O<sub>9</sub> calc: 1513.1548; found: 1515.2891 [M+2]<sup>+</sup>.

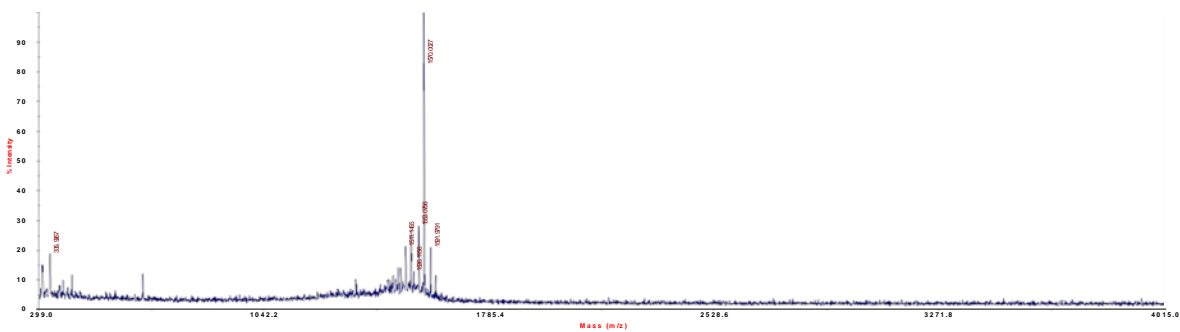

[R<sub>5</sub>K<sub>2</sub>]-C<sub>18</sub> (CP-C18): MALDI-TOF (m/z): C<sub>78</sub>H<sub>152</sub>N<sub>24</sub>O<sub>9</sub> calc: 1569.2174; found: 1570.0027  
[M+H]<sup>+</sup>.

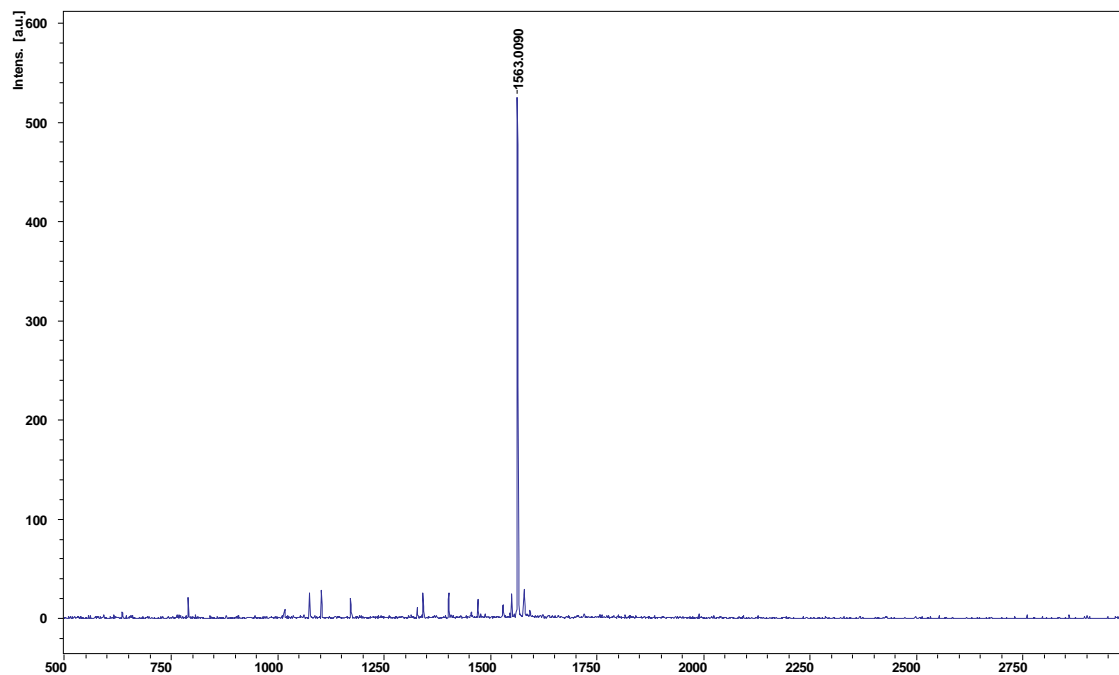

[R<sub>5</sub>K<sub>2</sub>]-C<sub>18</sub>\* (CP-C18\*): MALDI-TOF (m/z): C<sub>78</sub>H<sub>144</sub>N<sub>24</sub>O<sub>9</sub> calc: 1561.1548; found: 1563.0090 [M+2]<sup>+</sup>.

**Figure S2.** MALDI mass spectra for the designed modified peptides

## Materials

2-Chlorotriyl chloride arginine resin, Arg-Wang Resin, fluorenylmethoxycarbonyl (Fmoc)-Arg(Pbf)-OH, Fmoc-Lys(Dde)-OH, Fmoc-Lys(Boc)-OH, and Fmoc-Arg(Pbf)-OH were purchased from AAPPTec (Louisville, KY, USA). Acetic anhydride, succinic acid, adipic acid, suberic acid, caprylic acid, sebacic acid, lauric acid, myristic acid, palmitic acid, stearic acid, linoleic acid, piperidine, *N,N*-diisopropylethylamine (DIPEA), hydrazine monohydrate, anisole, thioanisole, dithiothreitol (DTT), *N*-methyilmorpholine, trifluoroacetic acid, acetonitrile, dichloromethane,  $\alpha$ -cyano-4-hydroxycinnamic acid ( $\alpha$ -cyano), and trifluoroethanol (TFE) were supplied by Sigma-Aldrich (St. Louis, MO, USA). XBridge BEH130 Prep C18 and XBridge BEH130 C18 columns were obtained from Waters Corporation (Milford, MA, USA). LC-2030C 3D and LC-20AP HPLC from Shimadzu (Columbia, MD, USA) were used for the purification of the peptides. High-resolution Autoflex speed MALDI-TOF used for mass spectrometry was from Bruker Inc. (Bremen, Germany). Tribute Automatic peptide synthesizer (Protein Technologies, Inc.) was used for the peptide synthesis, and all the accompanying accessories and supplies were manufactured by Protein Technologies Inc. (Tucson, AZ, USA). Hanks Balanced Salt Solution (HBSS), Dulbecco's modified Eagle medium (DMEM; low glucose with L-glutamine), RPMI Medium 1640 with L-glutamine, Fetal bovine serum (FBS), SYBR Green II, penicillin (10000U/mL), and streptomycin (10mg/mL) were provided by Life Technologies (Grand Island, NY, USA). Scrambled negative control siRNA (Catalogue # AM4635; Molecular weight: 13300), 5'-carboxyfluorescein (FAM)-labeled negative control siRNA (Catalogue # AM4620; Molecular weight: 13676), and the siRNA targeting kinesin spindle protein (KSP; Catalogue # AM16704; Molecular weight: 13842) were obtained from Ambion (Austin, TX). The siRNA targeting Janus kinase 2 (JAK2) was purchased from Qiagen (Catalogue # SI02659657, Valencia, CA, USA; Molecular Weight: 13255; Sense: 5'-CCAUCAUACGAGAUCUUAATT-3'; Antisense:

5'UUAAGAUCUCGUAUGAUGGCT-3'). All the primers were designed and ordered from Integrated DNA Technologies (IDT; Coralville, IA, USA). Heparin sodium salt from porcine intestinal mucosa was provided by Alfa Aesar (Ward Hill, MA). 1,2-dioleoyl-sn-glycero-3-phosphoethanolamine (DOPE) was purchased from Avanti Polar Lipids, Inc. (Alabaster, AL, USA). PCR master mixes iScript™ Reverse transcription Supermix and iTaq Universal SYBR Green Supermix were supplied by Bio-Rad (Hercules, CA). Ethylenediaminetetraacetic acid (EDTA) and all other materials were obtained from Fisher Scientific (Carlsbad, CA).
